# Supplementary material for: Silver(i)-catalyzed dehydrogenative cross-coupling of 2-aroylbenzofurans with phosphites
Source: Royal Society of Chemistry journal article supplement (doi:10.1039/d1nj06077e), 2022-01-01
Supplement: d1nj06077e1.pdf [file d1nj06077e1.pdf]

## Supporting Information

### Silver(I) catalyzed Dehydrogenative Cross-Coupling of 2-Aroylbenzofurans with Phosphites

*Jajula Kashanna\**, Rathod Aravind Kumar, Ravada Kishore, Prakash Raju Thommandru, Ravula Shrikanth, Sirasani Satyanarayana and Pilli V. V. N. Kishore

Department of Chemistry, Rajiv Gandhi University of Knowledge Technologies –Basar, Nirmal-504107, Telangana, India; Email: [jajulakashanna@yahoo.co.in](mailto:jajulakashanna@yahoo.co.in)

|   |                                                                                              | page no. |
|---|----------------------------------------------------------------------------------------------|----------|
| 1 | Copies of $^1\text{H}/^{13}\text{C}$ NMR spectra of selected 2-aroyl-3-phosphonylbenzofurans | S2-S10   |

# 1.0: $^1\text{H}$ and $^{13}\text{C}$ spectra of selected 2-aryl-3-phosphonylbenzofuran

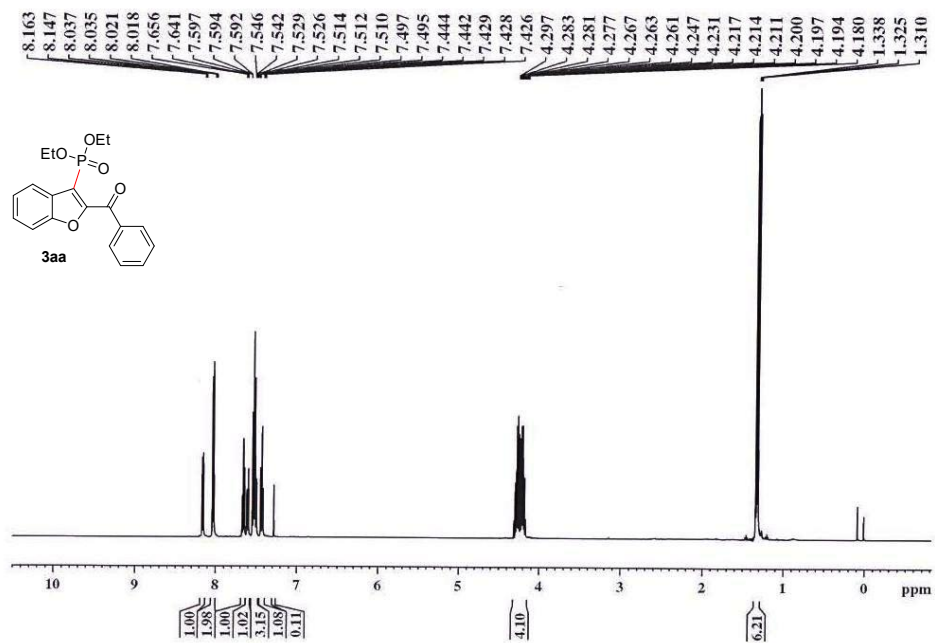

Figure S1.  $^1\text{H}$  NMR spectrum of compound 3aa

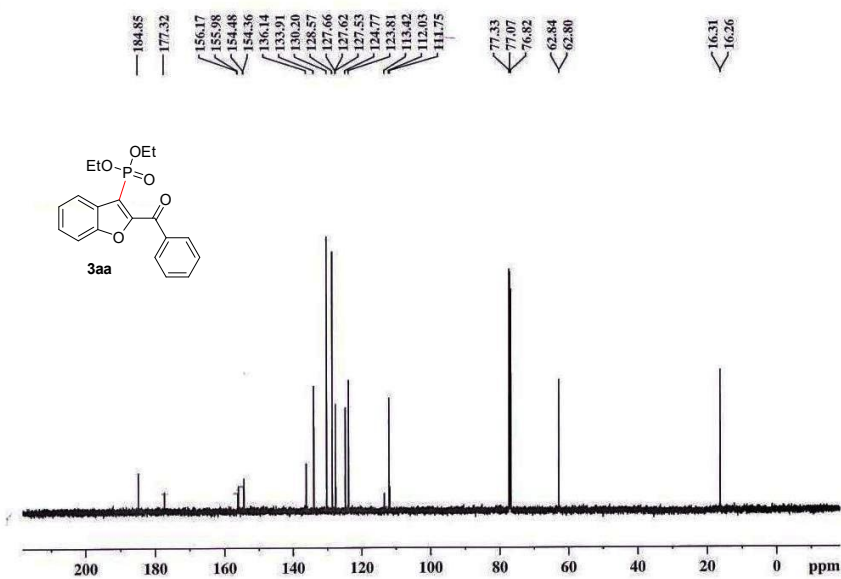

Figure S2.  $^{13}\text{C}$  NMR spectrum of compound 3aa

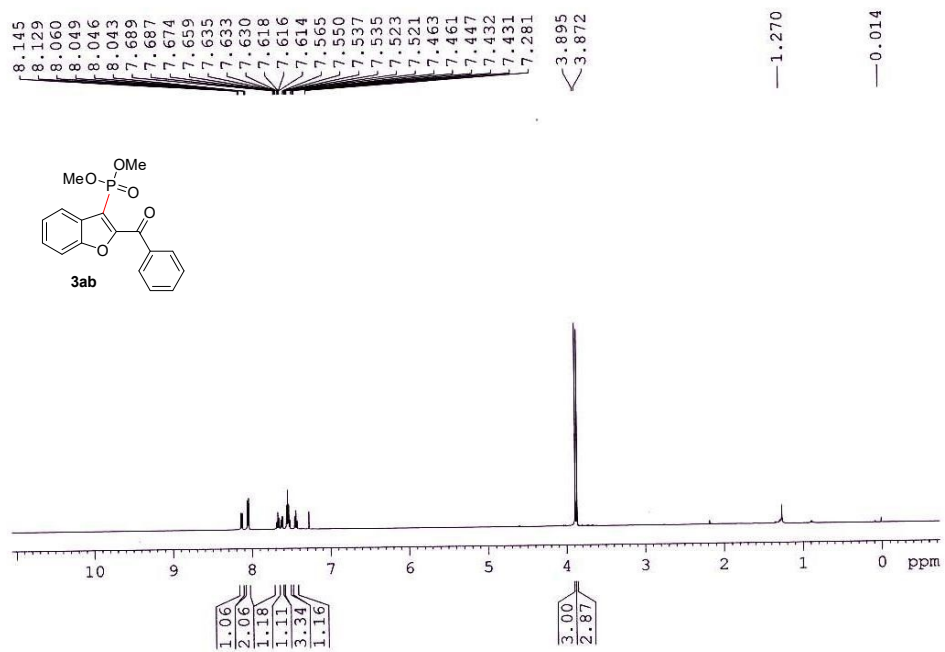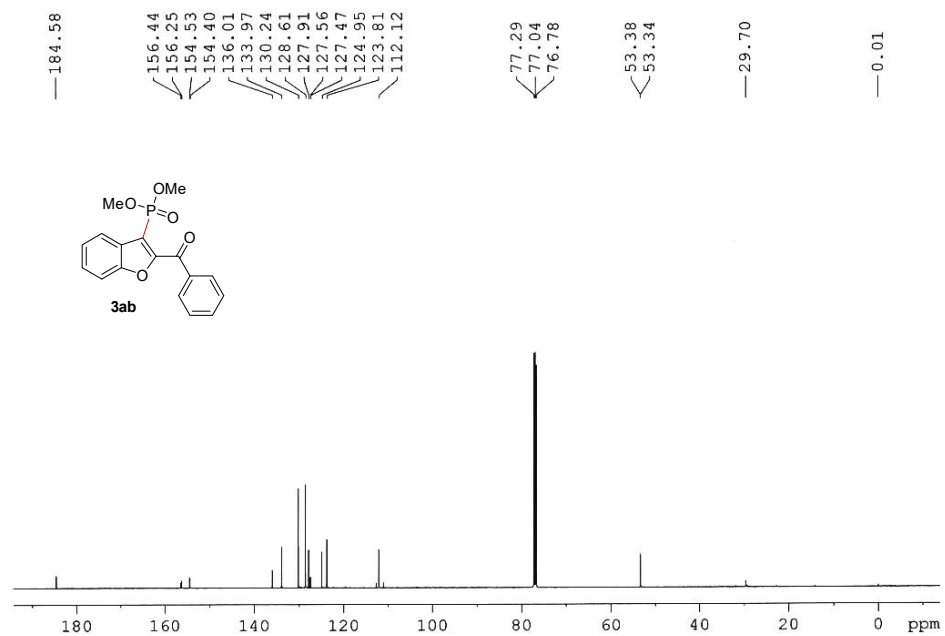

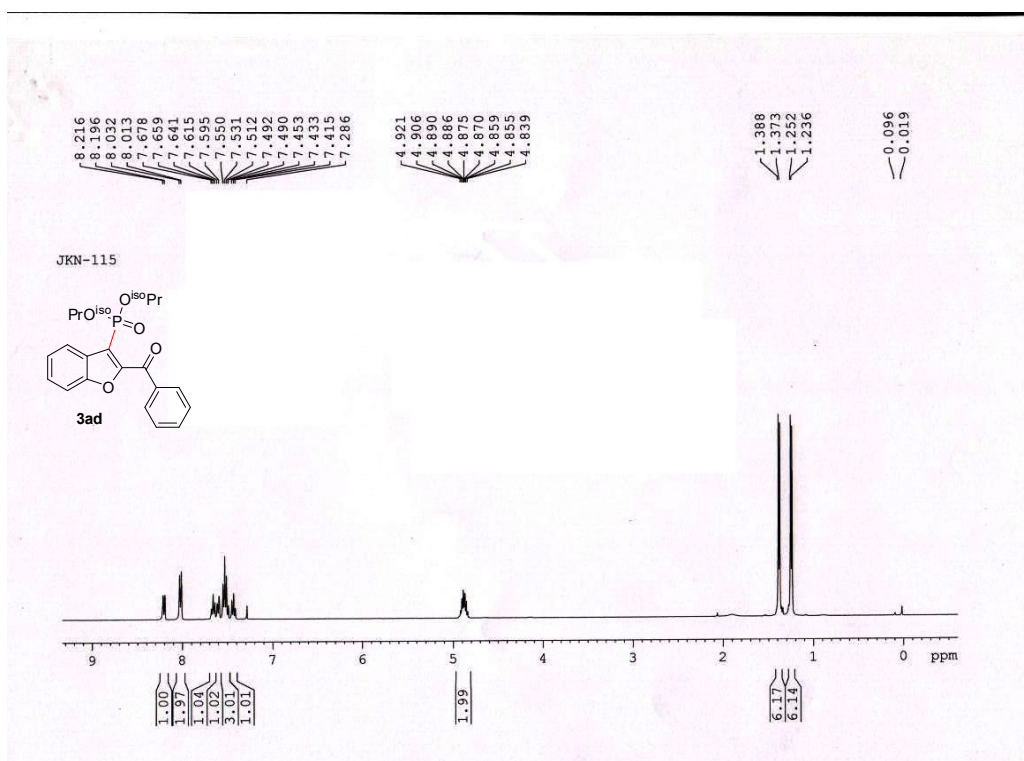

**Figure S5.** <sup>1</sup>H NMR spectrum of compound **3ad**

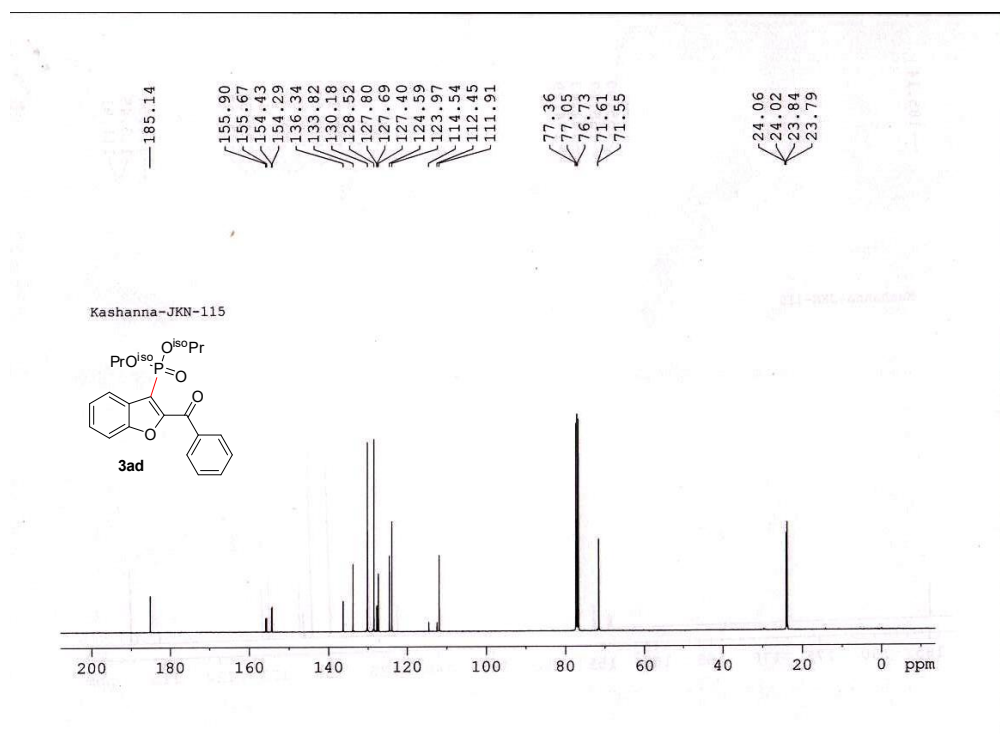

**Figure S6.** <sup>13</sup>C NMR spectrum of compound **3ad**

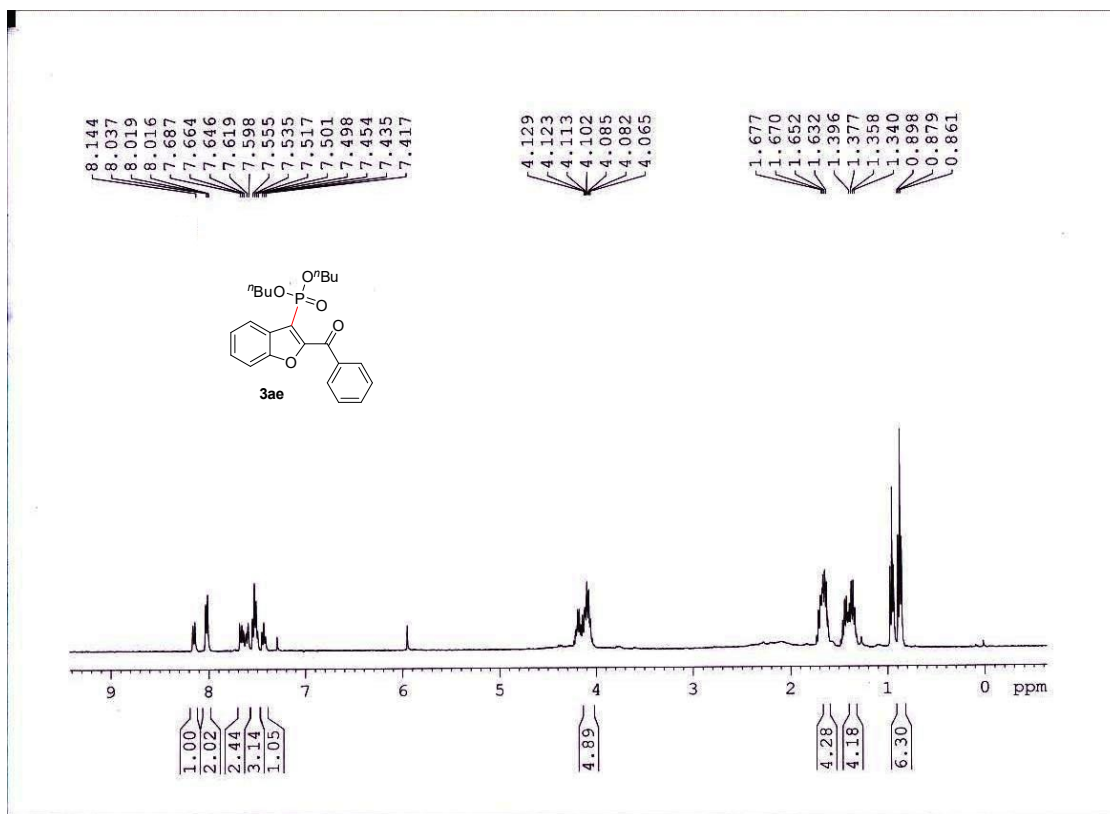

**Figure S7.** <sup>1</sup>H NMR spectrum of compound **3ae**

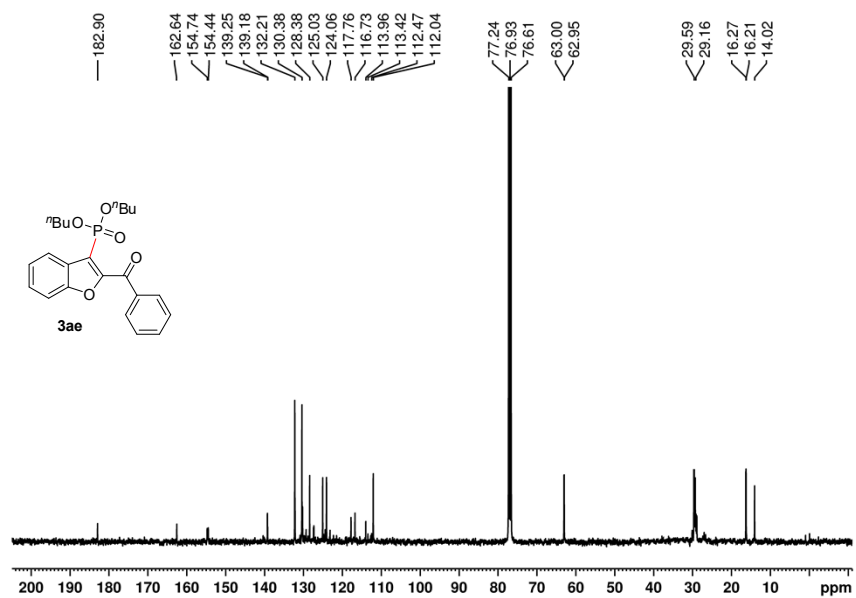

**Figure S8.** <sup>13</sup>C NMR spectrum of compound **3ae**

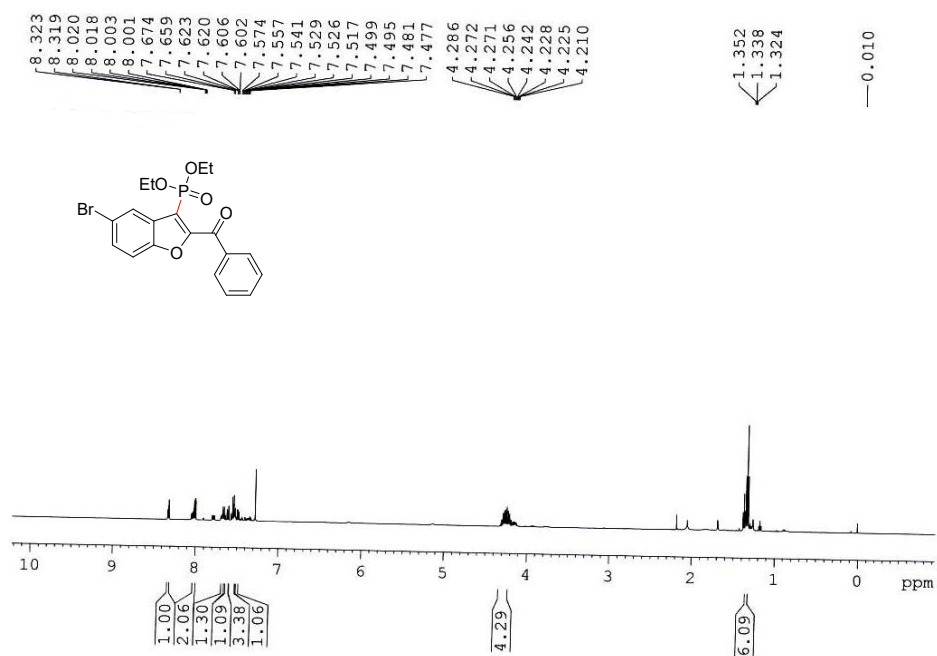

**Figure S9.** <sup>1</sup>H NMR spectrum of compound 3ba

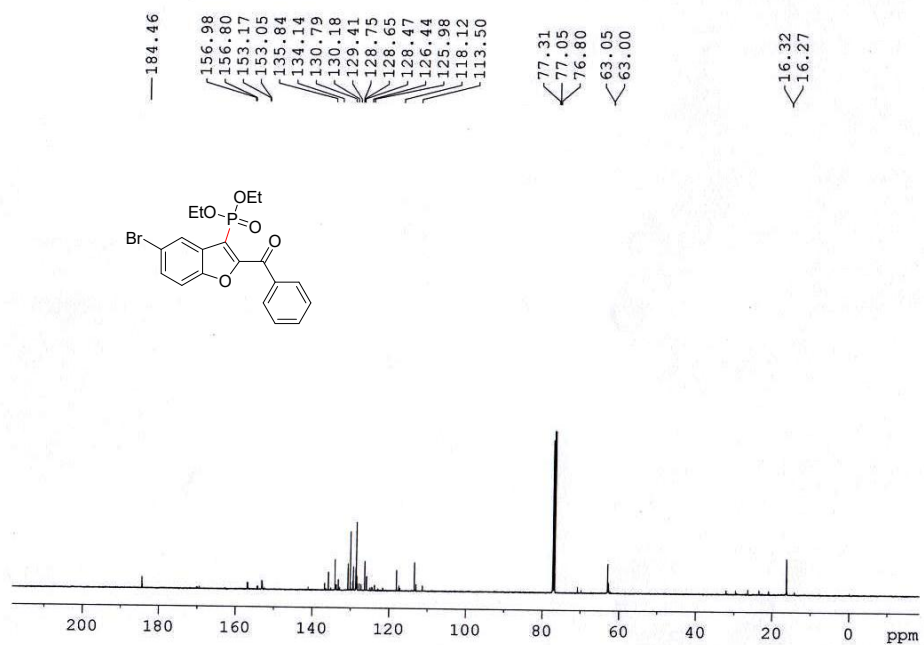

**Figure S10.** <sup>13</sup>C NMR spectrum of compound 3ba

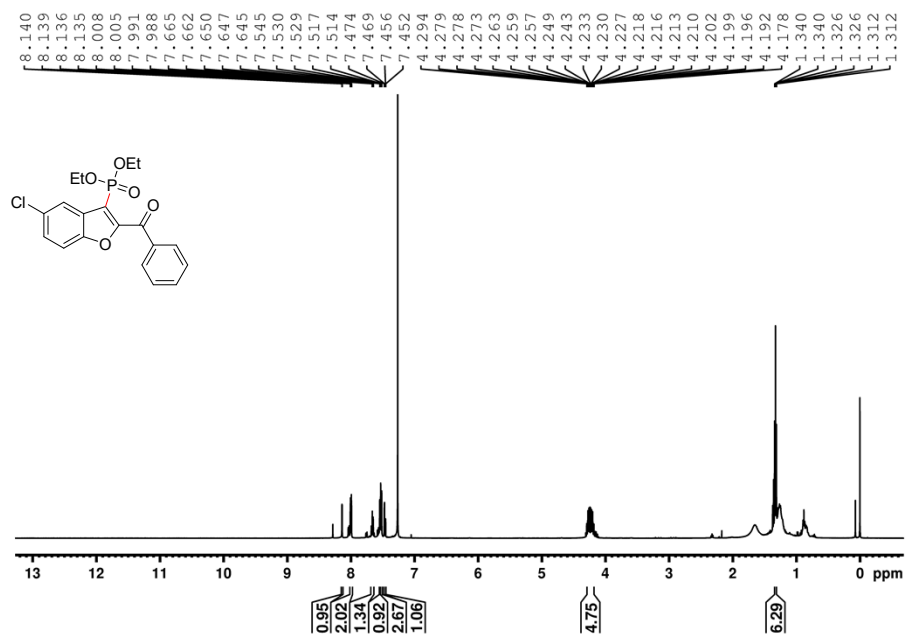

Figure S11. <sup>1</sup>H NMR spectrum of compound 3da

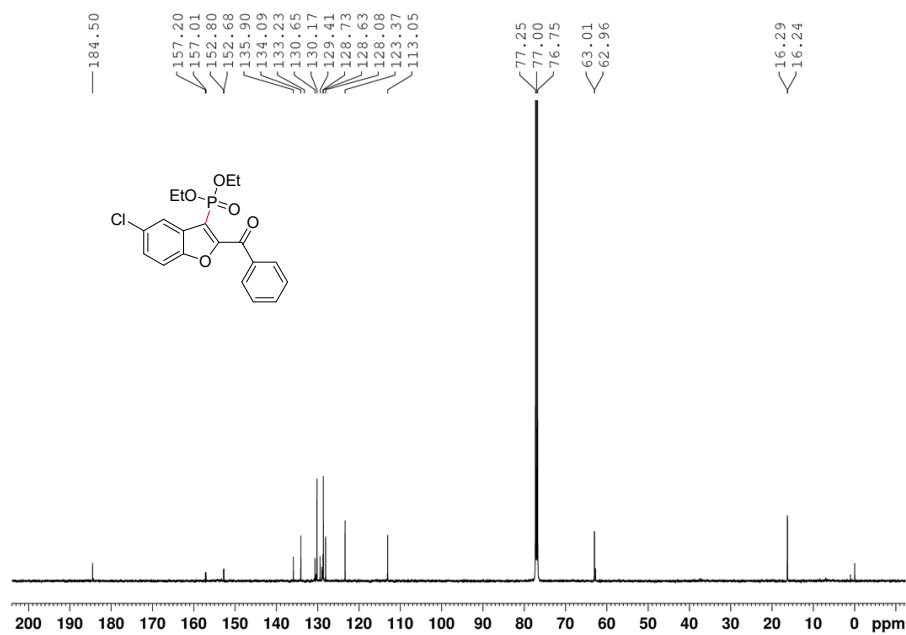

Figure S12. <sup>13</sup>C NMR spectrum of compound 3da

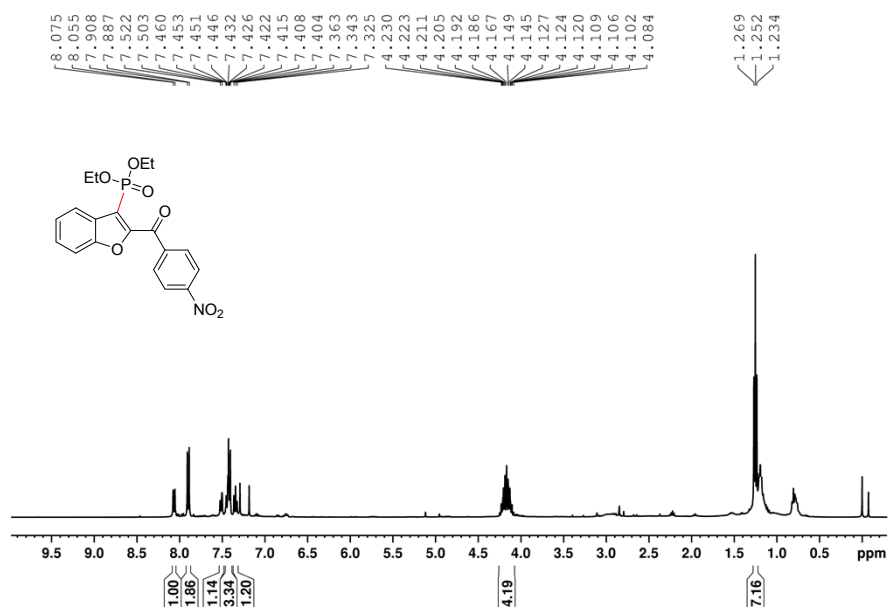

Figure S13. <sup>1</sup>H NMR spectrum of compound 3fa

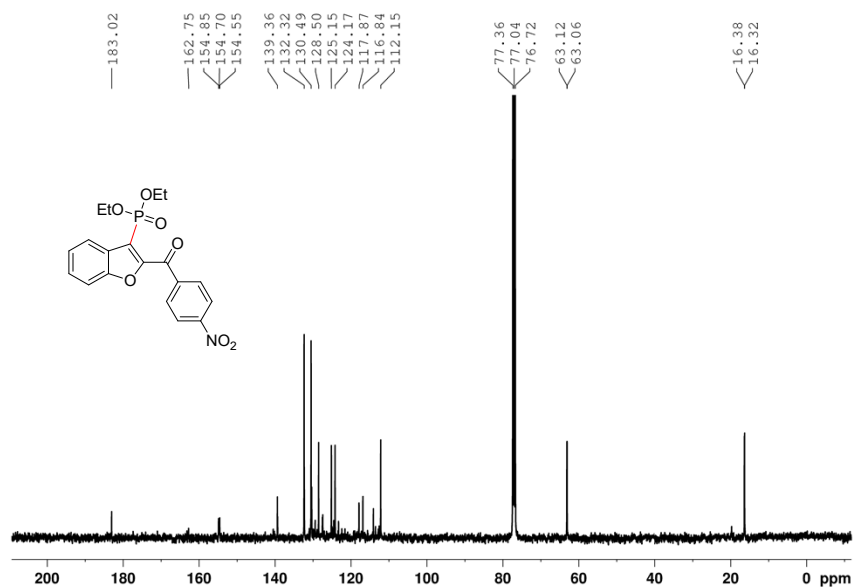

Figure S14. <sup>13</sup>C NMR spectrum of compound 3fa



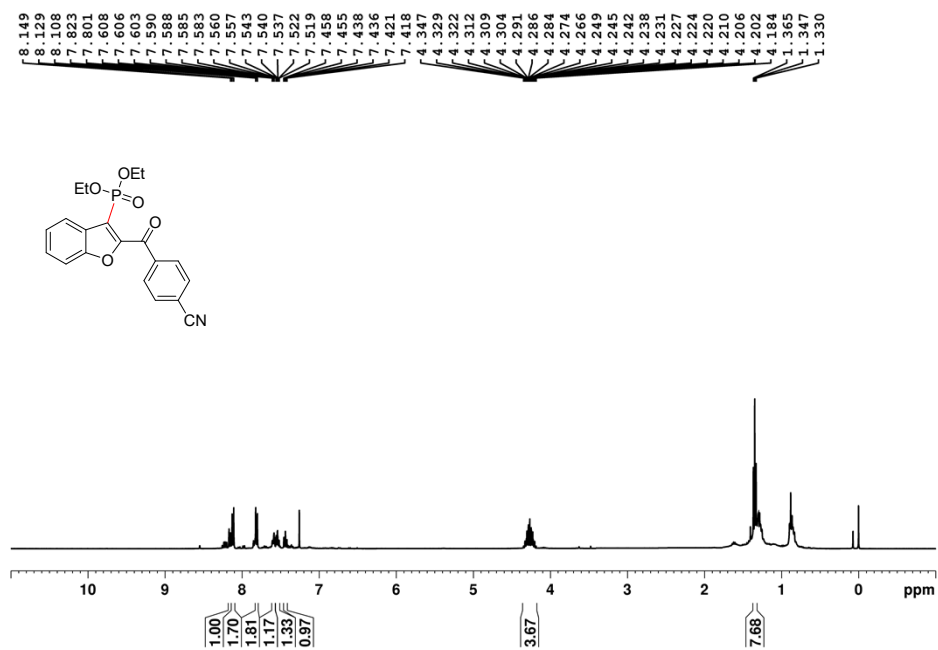

Figure S15. <sup>1</sup>H NMR spectrum of compound **3ga**

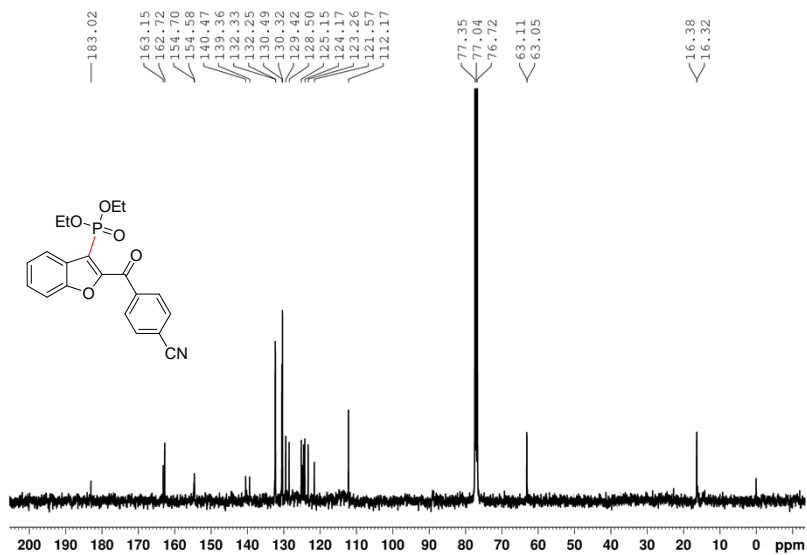

Figure S16. <sup>13</sup>C NMR spectrum of compound **3ga**

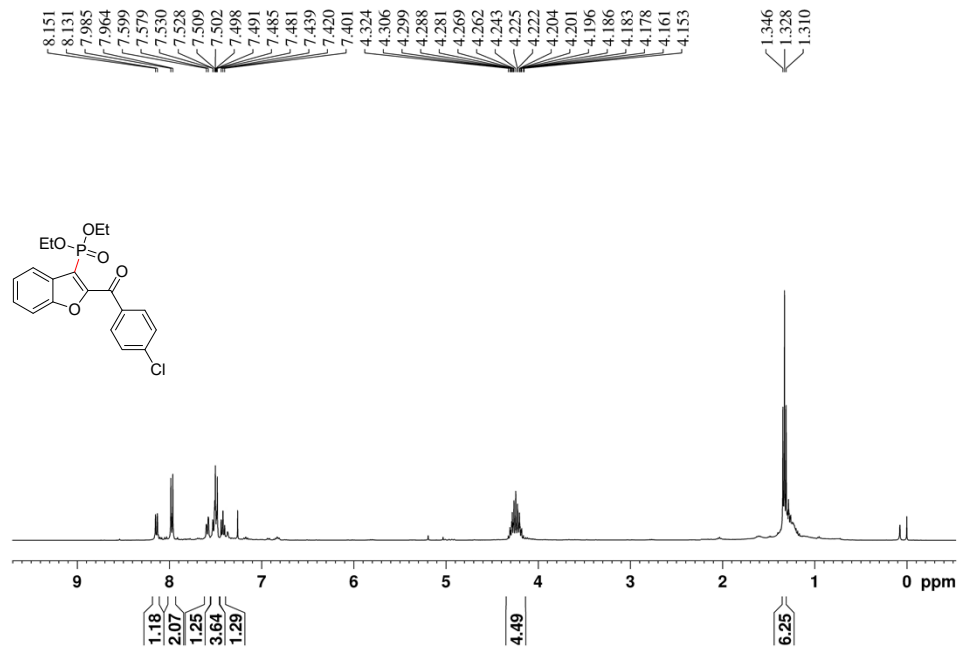

**Figure S17.** <sup>1</sup>H NMR spectrum of compound 3ha

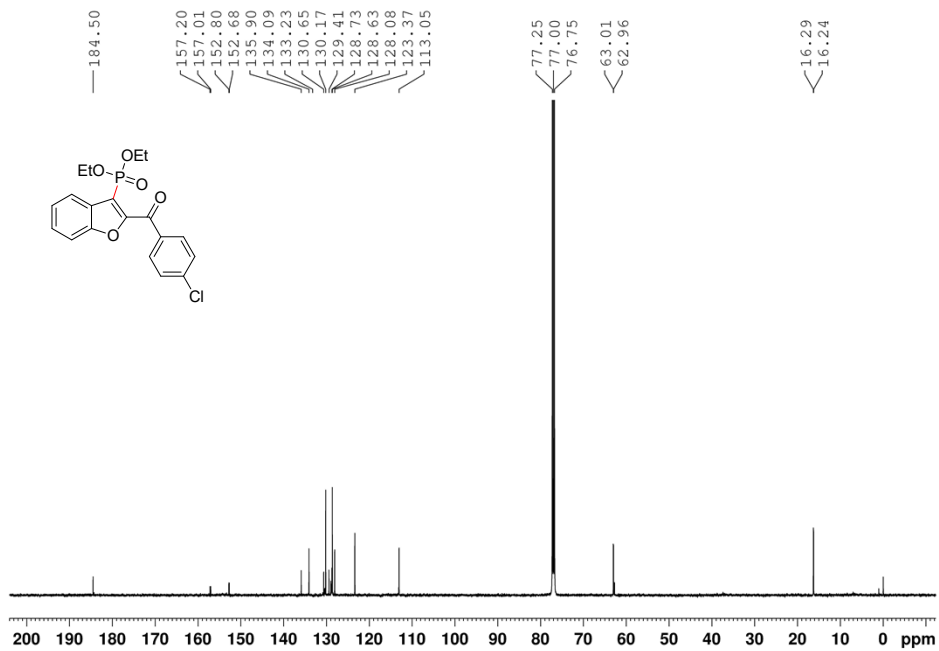

**Figure S18.** <sup>13</sup>C NMR spectrum of compound 3ha
